# Supplementary material
Source: MDPI journal article supplement (https://www.mdpi.com/1999-4907/9/1/20)
Supplement: s1 [file s1]

**Exhaustive list of the articles selected for the meta-analysis**

Andalo C, Beaulieu J, Bousquet J (2005) The impact of climate change on growth of local white spruce populations in Québec, Canada. Forest Ecol Manag 205:169–182.

Andersson M, Kellomäki S, Gardiner B, Blennow K (2015) Life-style services and yield from south Swedish forests adaptively managed against the risk of wind damage: a simulation study. Reg Environ Change 15:1489–1500.

Bele MY, Somorin O, Sonwa DJ, Nkem JN, Locatelli B (2011) Forests and climate change adaptation policies in Cameroon. Mitig Adapt Strateg Glob Change 16:369–385.

Bele MY, Tiani AM, Somorin OA, Sonwa DJ (2013) Exploring vulnerability and adaptation to climate change of communities in the forest zone of Cameroon. Climatic Change119:875–889.

Bernier P, Schoene D (2009) Adapting forests and their management to climate change: an overview. Unasylva 60:5–11.

Binkley CS, Van Kooten GC (1994) Integrating climatic change and forests: Economic and ecologic assessments. Climatic Change 28:91–110.

Blate GM, Joyce LA, Littell JS, McNulty SG, Millar CI, Moser SC, Neilson RP, O’Halloran K, Peterson DL (2009) Adapting to climate change in United States national forests. Unasylva 60:57-62

Blennow K (2012) Adaptation of forest management to climate change among private individual forest owners in Sweden. Forest Policy Econ 24:41–47.

Blennow K, Persson J (2009) Climate change: Motivation for taking measure to adapt. Global Environ Chang 19:100–104.

Blennow K, Persson J, Tome M, Hanewinkel M (2012) Climate change: believing and seeing implies adapting. PloS one 7(11):e50182.

Blennow K, Persson J, Wallin A, Vareman N, Persson E (2014) Understanding risk in forest ecosystem services: implications for effective risk management, communication and planning. Forestry 87:219–228.

Blennow K, Sallnäs O (2002) Risk Perception Among Non-industrial Private Forest Owners. Scand J Forest Res 17(5):472–479.

Bodin P, Wiman BLB (2007) The usefulness of stability concepts in forest management when coping with increasing climate uncertainties. Forest Ecol Manag 242:541–552.

Boisvenue C, Running SW (2006) Impacts of climate change on natural forest productivity - evidence since the middle of the 20th century. Glob Change Biol 12:862–882.

Bolte A, Ammer C, Löf M, Madsen P, Nabuurs G-J, Schall P, Spathelf P, Rock J (2009) Adaptive forest management in central Europe: Climate change impacts, strategies and integrative concept. Scand J Forest Res 24(6):473–482.

Booth TH (2013) Eucalypt plantations and climate change. Forest Ecol Manag 301:28–34.

Bouriaud L, Marzano M, Lexer M, Nichiforel L, Reyer C, Temperli C, Peltola H, Elkin C, Duduman G, Taylor P, Bathgate S, Borges JG, Clerkx S, Garcia-Gonzalo J, Gracia C, Hengeveld G, Kellomäki S, Kostov G, Maroschek M, Muys B, Nabuurs G-J, Nicoll B, Palahí M, Rammer W, Ray D, Schelhaas M-J, Sing L, Tomé M, Zell J, Hanewinkel M (2015) Institutional factors and opportunities for adapting European forest management to climate change. Reg Environ Change 15:1595–1609.

Brown HCP (2009) Climate change and Ontario forests: Prospects for building institutional adaptive capacity. Mitig Adapt Strateg Glob Change 14:513–536.

Brown HCP, Nkem JN, Sonwa DJ, Bele Y (2010) Institutional adaptive capacity and climate change response in the Congo Basin forests of Cameroon. Mitig Adapt Strateg Glob Change 15:263–282.

Brunette M, Costa S, Lecocq F (2014) Economics of species change subject to risk of climate change and increasing information: a (quasi-)option value analysis. Ann For Sci 71(2):279-290.

Cannell MGR, Grace J, Booth A (1989) Possible impacts of climatic warming on trees and forests in the United Kingdom: a review. Forestry 62(4):337–364.

Cerroni S, Shaw WD (2012) Does climate change information affect stated risks of pine beetle impacts on forests? An application of the exchangeability method. Forest Policy Econ 22:72–84.

Davidson DJ, Williamson T, Parkins JR (2003) Understanding climate change risk and vulnerability in northern forest-based communities. Can J Forest Res 33:2252–2261.

Eriksson L (2014) Risk Perception and Responses Among Private Forest Owners in Sweden. Small-scale Forestry 13:483–500.

Eriksson LO, Backéus S, Garcia F (2012) Implications of growth uncertainties associated with climate change for stand management. Eur J Forest Res 131:1199–1209.

Falk W, Mellert KH (2011) Species distribution models as a tool for forest management planning under climate change: risk evaluation of Abies alba in Bavaria. J Veg Sci 22:621-634.

Fernandez-Gimenez ME, Ballard HL, Sturtevant VE (2008) Adaptive management and social learning in collaborative and community-based monitoring: a study of five community-based forestry organizations in the western USA. Ecol Soc 13(2):4.

Fuhrer J, Beniston M, Fischlin A, Frei C, Goyette S, Jasper K, Pfister C (2006) Climate Risks and Their Impact on Agriculture and Forests in Switzerland. Climatic Change 79:79–102.

Grotta AT, Creighton JH, Schnepf C, Kantor S (2013) Family Forest Owners and Climate Change: Understanding, Attitudes, and Educational Needs. J Forest 111(2):87–93.

Guariguata MR, Locatelli B, Haupt F (2012) Adapting tropical production forests to global climate change: risk perceptions and actions. Int Forest Rev 14(1):27–38.

Hanewinkel M, Hummel S, Cullmann DA (2010) Modelling and economic evaluation of forest biome shifts under climate change in Southwest Germany. Forest Ecol Manag 259:710–719.

Hlásny T, Mátyás C, Seidl R, Kulla L, Merganičová K, Trombik J, Dobor L, Barcza Z, Konôpka B (2014) Climate change increases the drought risk in Central European forests: What are the options for adaptation? Lesn Cas For J 60:5–18.

Ingold K, Zimmermann W (2011) How and why forest managers adapt to socio-economic changes: A case study analysis in Swiss forest enterprises. Forest Policy Econ 13:97–103.

Johnston M, Hesseln H (2012) Climate change adaptive capacity of the Canadian forest sector. Forest Policy Econ 24:29–34.

Johnston M, Williamson T (2007) A framework for assessing climate change vulnerability of the Canadian forest sector. Forest Chron 83(3):358–361.

Jönsson AM, Swartling ÅG (2014) Reflections on Science–Stakeholder Interactions in Climate Change Adaptation Research within Swedish Forestry. Soc Natur Resour 27(11):1130–1144.

Keenan RJ (2015) Climate change impacts and adaptation in forest management: a review. Ann For Sci 72:145–167.

Keskitalo ECH (2008) Vulnerability and adaptive capacity in forestry in northern Europe: a Swedish case study. Climatic Change 87:219–234.

Kienast F, Brzeziecki B, Wildi O (1996) Long-term adaptation potential of Central European mountain forests to climate change: a GIS-assisted sensitivity assessment. Forest Ecol Manag 80:133-153.

Kolström M, Lindner M, Vilén T, Maroschek M, Seidl R, Lexer MJ, Netherer S, Kremer A, Delzon S, Barbati A, Marchetti M, Corona P (2011) Reviewing the Science and Implementation of Climate Change Adaptation Measures in European Forestry. Forests 2:961–982.

Laatsch J, Ma Z (2015) Strategies for Incorporating Climate Change into Public Forest Management. J For 113(3):335–342.

Lawrence A, Marzano M (2014) Is the private forest sector adapting to climate change? A study of forest managers in north Wales. Ann For Sci 71(2):291–300.

Lenart M, Jones C (2014). Perceptions on Climate Change Correlate with Willingness to Undertake Some Forestry Adaptation and Mitigation Practices. J For 112(6):553–563.

Lidskog R, Sjödin D (2014) Why do forest owners fail to heed warnings? Conflicting risk evaluations made by the Swedish forest agency and forest owners. Scand J Forest Res 29(3): 275-282.

Lindahl KB, Westholm E (2012) Future forests: Perceptions and strategies of key actors. Scand J Forest Res 27(2):154–163.

Lindner M, Fitzgerald JB, Zimmermann NE, Reyer C, Delzon S, van der Maaten E, Schelhaas M-J, Lasch P, Eggers J, van der Maaten-Theunissen M, Suckow F, Psomas A, Poulter B, Hanewinkel M (2014) Climate change and European forests: What do we know, what are the uncertainties, and what are the implications for forest management? J Environ Manage 146:69–83.

Littell JS, Peterson DL, Millar CI, O’Halloran KA (2012) US National Forests adapt to climate change through Science–Management partnerships. Climatic Change 110:269–296.

McKinnon GA, Webber SL (2005) Climate change impacts and adaptation in Canada: Is the forest sector prepared? Forest Chron 81(5):653-654.

Milad M, Schaich H, Konold W (2013) How is adaptation to climate change reflected in current practice of forest management and conservation? A case study from Germany. Biodivers Conserv 22:1181–1202.

Mirza MMQ (2003) Climate change and extreme weather events: can developing countries adapt? Clim Policy 3(3):233–248.

Morin MB, Kneeshaw D, Doyon F, Le Goff H, Bernier P, Yelle V, Blondlot A, Houle D (2015) Climate change and the forest sector: Perception of principal impacts and of potential options for adaptation. Forest Chron 91(4):395–406.

Neuner S, Albrecht A, Cullmann D, Engels F, Griess VC, Hahn WA, Hanewinkel M, Härtl F, Kölling C, Staupendahl K, Knoke T (2015) Survival of Norway spruce remains higher in mixed stands under a dryer and warmer climate. Glob Change Biol 21:935–946.

Nitschke CR, Innes JL (2008) Integrating climate change into forest management in South-Central British Columbia: An assessment of landscape vulnerability and development of a climate-smart framework. Forest Ecol Manag 256:313–327.

Ochuodho TO, Lantz VA, Lloyd-Smith P, Benitez P (2012) Regional economic impacts of climate change and adaptation in Canadian forests: A CGE modeling analysis. Forest Policy Econ 25:100–112.

Ogden AE, Innes J (2007) Incorporating climate change adaptation considerations into forest management planning in the boreal forest. Int Forest Rev 9(3):713-733.

Ogden AE, Innes JL (2008) Climate change adaptation and regional forest planning in southern Yukon, Canada. Mitig Adapt Strateg Glob Change 13:833–861.

Ogden AE, Innes JL (2007) Perspectives of forest practitioners on climate change adaptation in the Yukon and Northwest Territories of Canada. Forest Chron 83(4):557–569.

Ogden AE, Innes JL (2009) Application of structured decision making to an assessment of climate change vulnerabilities and adaptation options for sustainable forest management. Ecol Soc 14(1):11.

Ohlson DW, McKinnon GA, Hirsch KG (2005) A structured decision-making approach to climate change adaptation in the forest sector. Forest Chron 81(1):97–103.

Petr M, Boerboom L, Ray D, van der Veen A (2014) An uncertainty assessment framework for forest planning adaptation to climate change. Forest Policy Econ 41:1–11.

Raftoyannis Y, Nocentini S, Marchi E, Calama Sainz R, Garcia Guemes C, Pilas I, Peric S, Amaral Paulo J, Moreira-Marcelino A, Costa-Ferreira M, Kakouris E, Lindner M (2014) Perceptions of forest experts on climate change and fire management in European Mediterranean forests. iForest 7:33–41.

Rammer W, Seidl R (2015) Coupling human and natural systems: Simulating adaptive management agents in dynamically changing forest landscapes. Global Environ Chang 35:475–485.

Ravindranath NH (2007) Mitigation and adaptation synergy in forest sector. Mitig Adapt Strat Glob Change 12:843–853.

Rist L, Moen J (2013) Sustainability in forest management and a new role for resilience thinking. Forest Ecol Manag 310:416–427.

Schelhaas M-J, Hengeveld G, Moriondo M, Reinds GJ, Kundzewicz ZW, ter Maat H, Bindi M (2010) Assessing risk and adaptation options to fires and windstorms in European forestry. Mitig Adapt Strateg Glob Change 15:681–701.

Schou E, Thorsen BJ, Jacobsen JB (2015) Regeneration decisions in forestry under climate change related uncertainties and risks: Effects of three different aspects of uncertainty. Forest Policy Econ 50:11–19.

Seidl R, Lexer MJ (2013) Forest management under climatic and social uncertainty: Trade-offs between reducing climate change impacts and fostering adaptive capacity. J Environ Manage 114:461–469.

Seidl R, Rammer W, Lexer MJ (2011) Climate change vulnerability of sustainable forest management in the Eastern Alps. Climatic Change 106:225–254.

Seidl R, Schelhaas M-J, Lindner M, Lexer MJ (2009) Modelling bark beetle disturbances in a large scale forest scenario model to assess climate change impacts and evaluate adaptive management strategies. Reg Environ Change 9:101–119.

Seppälä R (2009) A global assessment on adaptation of forests to climate change. Scand J Forest Res 24(6):469–472.

Siddiqui KM, Mohammad I, Ayaz M (1999) Forest ecosystem climate change impact assessment and adaptation strategies for Pakistan. Clim Res 12:195–203.

Somorin OA, Brown HCP, Visseren-Hamakers IJ, Sonwa DJ, Arts B, Nkem J (2012) The Congo Basin forests in a changing climate: Policy discourses on adaptation and mitigation (REDD+). Global Environ Chang 22:288–298.

Sonwa DJ, Somorin OA, Jum C, Bele MY, Nkem JN (2012) Vulnerability, forest-related sectors and climate change adaptation: The case of Cameroon. Forest Policy Econ 23:1–9.

Spathelf P, Van Der Maaten E, Van Der Maaten-Theunissen M, Campioli M, Dobrowolska D (2014) Climate change impacts in European forests: the expert views of local observers. Ann For Sci 71(2):131–137.

Spies TA, Giesen TW, Swanson FJ, Franklin JF, Lach D, Johnson KN (2010) Climate change adaptation strategies for federal forests of the Pacific Northwest, USA: ecological, policy, and socio-economic perspectives. Landscape Ecol 25:1185–1199.

Spittlehouse DL, Stewart RB (2003) Adaptation to climate change in forest management. BC J Ecosyst Manag 4(1):1-11.

Stankey GH, Bormann BT, Ryan C, Shindler B, Sturtevant V, Clark RN, Philpot C (2003) Adaptive management and the Northwest Forest Plan: Rhetoric and Reality. J Forest 101:40–46.

von Detten R, Faber F (2013) Organizational decision-making by German state-owned forest companies concerning climate change adaptation measures. Forest Policy Econ 35:57–65.

Vulturius G, Swartling ÅG (2015) Overcoming social barriers to learning and engagement with climate change adaptation: experiences with Swedish forestry stakeholders. Scand J Forest Res 30(3):217–225.

Wagner S, Nocentini S, Huth F, Hoogstra-Klein M (2014) Forest management approaches for coping with the uncertainty of climate change: trade-offs in service provisioning and adaptability. Ecol Soc 19(1):32.

Williamson TB, Parkins JR, McFarlane BL (2005) Perceptions of climate change risk to forest ecosystems and forest-based communities. Forest Chron 81(5):710–716.

Yousefpour R, Didion M, Jacobsen JB, Meilby H, Hengeveld GM, Schelhaas M-J, Thorsen BJ (2015) Modelling of adaptation to climate change and decision-makers behaviours for the Veluwe forest area in the Netherlands. Forest Policy Econ 54:1–10.

Yousefpour R, Hanewinkel M (2015) Forestry professionals’ perceptions of climate change, impacts and adaptation strategies for forests in south-west Germany. Climatic Change 130:273–286.

Yousefpour R, Hanewinkel M (2014) Balancing Decisions for Adaptive and Multipurpose Conversion of Norway Spruce (Picea abies; L. Karst) Monocultures in the Black Forest Area of Germany. For Sci 60(1):73–84.

Yousefpour R, Hanewinkel M, Le Moguédec G (2010) Evaluating the Suitability of Management Strategies of Pure Norway Spruce Forests in the Black Forest Area of Southwest Germany for Adaptation to or Mitigation of Climate Change. Environ Manage 45:387–402.

Yousefpour R, Jacobsen JB, Meilby H, Thorsen BJ (2014) Knowledge update in adaptive management of forest resources under climate change: a Bayesian simulation approach. Ann For Sci71(2):301–312.

Yousefpour R, Jacobsen JB, Thorsen BJ, Meilby H, Hanewinkel M, Oehler K (2012) A review of decision-making approaches to handle uncertainty and risk in adaptive forest management under climate change. Ann For Sci69:1–15.

Yousefpour R, Temperli C, Bugmann H, Elkin C, Hanewinkel M, Meilby H, Jacobsen JB, Thorsen BJ (2013) Updating beliefs and combining evidence in adaptive forest management under climate change: A case study of Norway spruce (Picea abies L. Karst) in the Black Forest, Germany. J Environ Manage 122:56–64.

Živojinović I, Wolfslehner B (2015) Perceptions of urban forestry stakeholders about climate change adaptation – A Q-method application in Serbia. Urban For Urban Gree 14:1079–1087.
